# Supplementary material
Source: ML conference proceedings conference paper supplement (https://openaccess.thecvf.com/content/CVPR_2019/html/Ming_Group_Sampling_for_CVPR_2019_paper.html)
Supplement: Supplementary file 2 [file Ming_Group_Sampling_for_CVPR_2019_supplemental.pdf]

# Supplementary Material of Group Sampling for Scale Invariant Face Detection

Xiang Ming<sup>1\*</sup> Fangyun Wei<sup>2</sup> Ting Zhang<sup>2</sup> Dong Chen<sup>2</sup> Fang Wen<sup>2</sup>  
Xi'an Jiaotong University<sup>1</sup> Microsoft Research Asia<sup>2</sup>  
xjtustu.mx@stu.xjtu.edu.cn {fawe,tinzhan,doch,fangwen}@microsoft.com

## 1. More Comparison Results

**Results on WIDER FACE test set.** We show the comparison results on the WIDER FACE [2] test set in Figure 1. We can see that our approach achieves state-of-the-art performance on hard subset.

**Results on AFW.** The comparison results on Annotated Faces in the Wild (AFW) [3] in terms of Precision-Recall curve are shown in Figure 2a. This dataset consists of 205 images with 473 annotated faces. As we can see, our approach achieves comparable performance with other methods.

**Results on PASCAL Faces.** We also replot the results of our approach on the PASCAL Faces [1], which contains 851 images with 1,335 labeled faces. The comparison is illustrated in Figure 2b, showing that our approach achieves state-of-the-art performance.

## 2. Qualitative Results

Figure 3 illustrates some the detection results of our approach on several example images which are mainly from WIDER FACE test set, showing the robustness of our model.

## References

- [1] J. Yan, X. Zhang, Z. Lei, and S. Z. Li. Face detection by structural models. *Image and Vision Computing*, 32(10):790–799, 2014. 1
- [2] S. Yang, P. Luo, C.-C. Loy, and X. Tang. Wider face: A face detection benchmark. In *Proceedings of the IEEE Conference on Computer Vision and Pattern Recognition*, pages 5525–5533, 2016. 1
- [3] X. Zhu and D. Ramanan. Face detection, pose estimation, and landmark localization in the wild. In *Computer Vision and Pattern Recognition (CVPR), 2012 IEEE Conference on*, pages 2879–2886. IEEE, 2012. 1

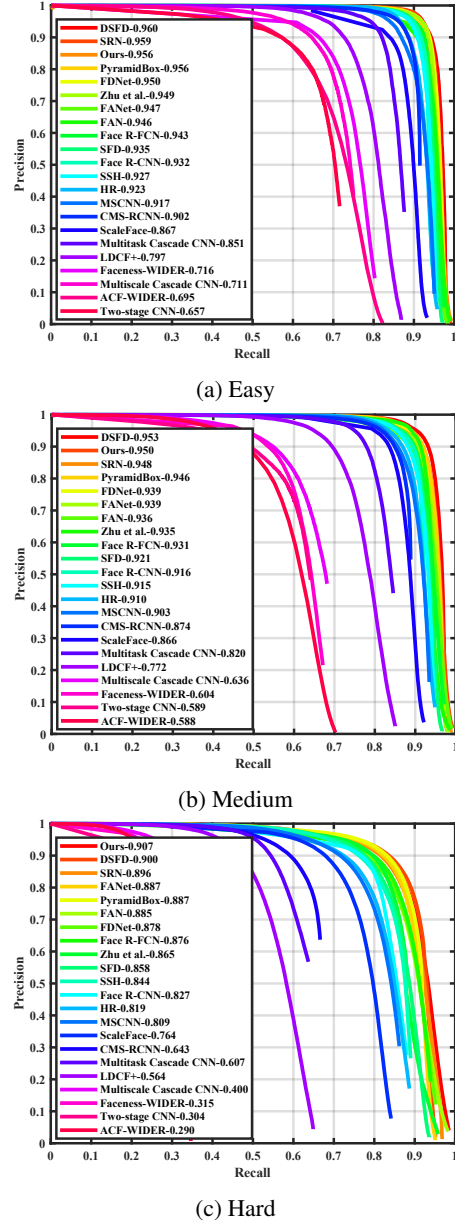

Figure 1: Performance comparison with other methods in terms of precision-recall curves on WIDER FACE test set.

\*Work done during the internship at Microsoft Research Asia.

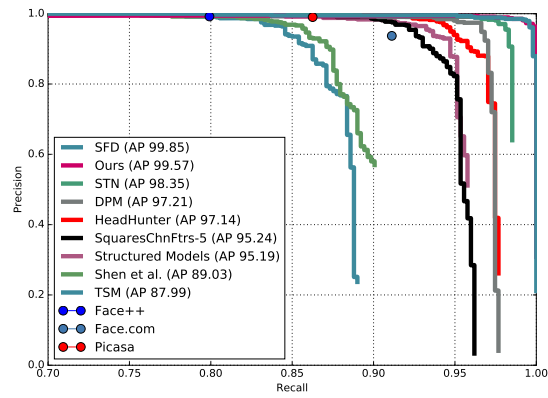

(a) AFW

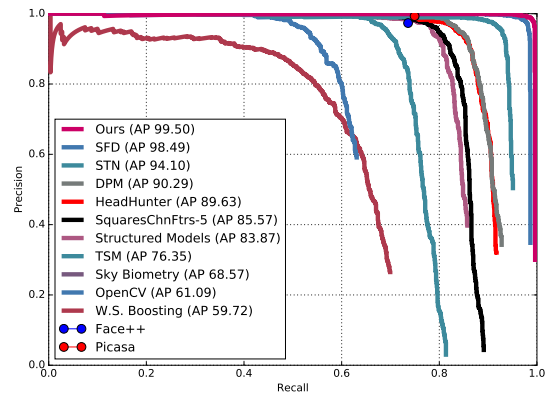

(b) PASCAL

Figure 2: Performance comparison on (a) AFW and (b) PASCAL Faces.

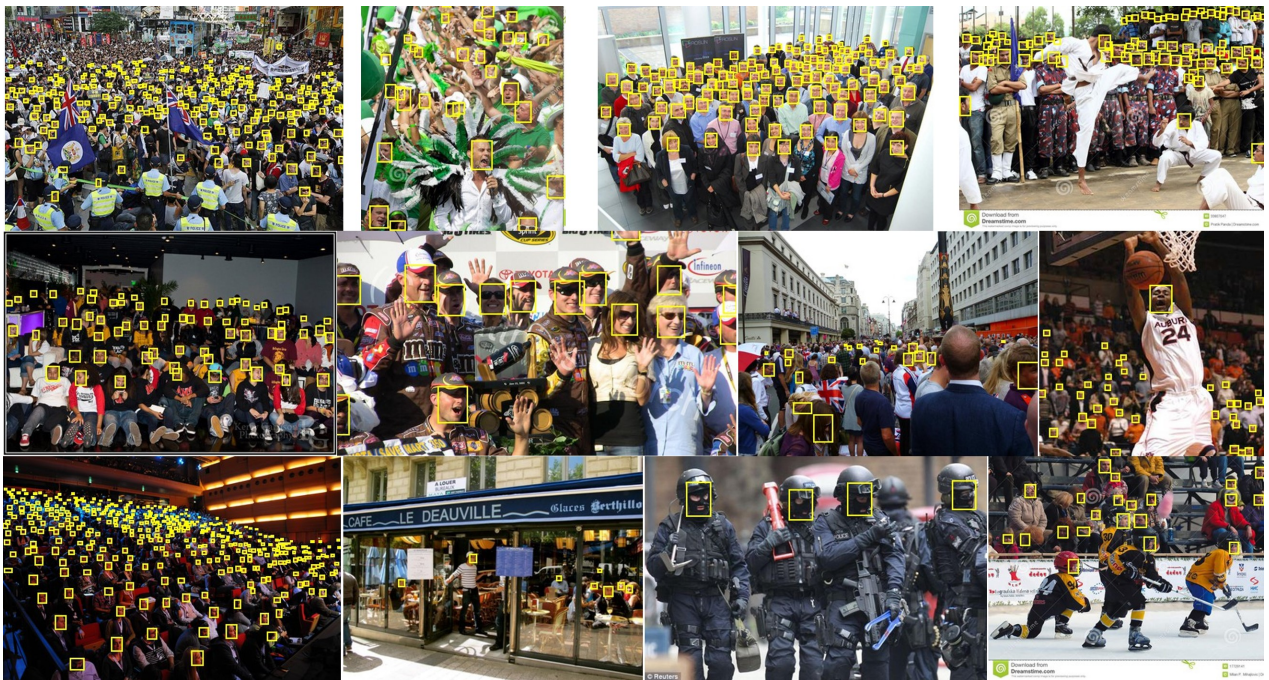

Figure 3: Illustration of the detection results of our approach for faces with a high degree of variability in scale, pose, and occlusion.
